# Supplementary material for: Synthesis, structure, and properties of a dialumane supported by pyrazolate ligands
Source: Royal Society of Chemistry journal article supplement (doi:10.1039/c4dt03533j), 2014-12-11
Supplement: c4dt03533j1.pdf [file c4dt03533j1.pdf]

## Supplemental Information:

### Experimental:

**General Considerations:** All reactions were performed in an inert atmosphere using standard Schlenk and dry box techniques. Toluene, diethyl ether, and tetrahydrofuran were purified by distillation from sodium benzophenone ketyl under a dinitrogen atmosphere. All purified solvents were stored in modified Schlenk vessels over 3 Å molecular sieves under a dinitrogen atmosphere.  $[\text{Na}(\text{THF})][\text{Ph}_2\text{pz}]^{6d}$  and  $\text{AlCl} \cdot (\text{OEt}_2)_n^{14}$  were prepared according to literature procedures.  $^1\text{H}$  and  $^{13}\text{C}\{^1\text{H}\}$  NMR spectra were collected on a Bruker 500 MHz instrument. Elemental analysis was performed by Galbraith Laboratories.

$\text{AlCl} \cdot (\text{OEt}_2)_n$ : The synthesis of  $\text{AlCl} \cdot (\text{OEt}_2)_n$  prepared according to the published literature procedures.<sup>14</sup> Molten aluminum metal heated to approximately 1200 K in a graphite furnace was reacted with a slow, steady stream of gaseous hydrogen chloride through a mass flow controller over a 3 h period in a modified Schnöckel-type metal halide co-condensation reactor. The resultant gas-phase AlCl was co-condensed with a mixture of toluene:diethyl ether (3:1 v/v) onto the walls of the stainless steel reaction chamber cooled to 77 K with liquid nitrogen. The solvent matrix was thawed and the resultant yellow-brown solution was collected in a 200 mL Schlenk flask cooled to -78 °C using dry ice. The solution was stored in a -80 °C freezer prior to use.

$[\text{Al}_2][\text{Na}(\text{Ph}_2\text{pz})_3]_2 \cdot \text{toluene}$  (**1**·toluene): A 100 mL round-bottom Schlenk flask equipped with a magnetic stir bar was charged with  $[\text{Na}(\text{THF})][\text{Ph}_2\text{pz}]$  (1.000 g, 3.181 mmol) and THF (10 mL). A 165 mM solution of AlCl (12.8 mL, 2.12 mmol) in 3:1 mixture of toluene:OEt<sub>2</sub> held at -78 °C was added quickly to the  $[\text{Na}(\text{THF})][\text{Ph}_2\text{pz}]$  solution at room temperature and the resulting orange-brown mixture was stirred at room temperature for 16 h. The volatiles were removed under reduced pressure and the resulting

brown residue was extracted with toluene (10 mL) and filtered through a medium porosity glass frit with 2 cm of Celite. The filtrate was heated in an oil bath held at 60 °C for 7 days resulting in the formation of pale yellow crystals (0.085 g, 5.32 %).  $^1\text{H}$  NMR ( $\text{THF-}d_8$ , 23 °C,  $\delta$ ) 6.93-7.82 (m, 65 H, aromatic CH), 6.34 (br s, 6 H, pyrazolate-4-CH), 2.31 (s,  $\text{C}_6\text{H}_5\text{CH}_3$ , 3 H);  $^{13}\text{C}\{^1\text{H}\}$  NMR ( $\text{THF-}d_8$ , 23 °C, ppm) 155.5 (s, pyrazolate C- $\text{C}_6\text{H}_5$ ), 135.4 (s, *ipso*-C of  $\text{C}_6\text{H}_5$ ), 129.7 (s, *ortho*-CH of toluene), 129.0 (s, *meta*-CH of toluene), 128.6 (s, *ortho*-CH of  $\text{C}_6\text{H}_5$ ), 128.0 (s, *meta*-CH of  $\text{C}_6\text{H}_5$ ), 127.2 (*para*-CH of  $\text{C}_6\text{H}_5$ ), 126.1 (s, *para*-CH of  $\text{C}_6\text{H}_5$ ), 105.3 (s, pyrazolate 4-CH), 21.5 (s,  $\text{CH}_3$  of toluene). Anal Calcd. for  $\text{C}_{97}\text{H}_{74}\text{Al}_2\text{N}_{12}\text{Na}_2$ : C, 77.28; H, 4.95; N, 11.15. Found: C, 76.64; H, 4.91; N, 11.27.

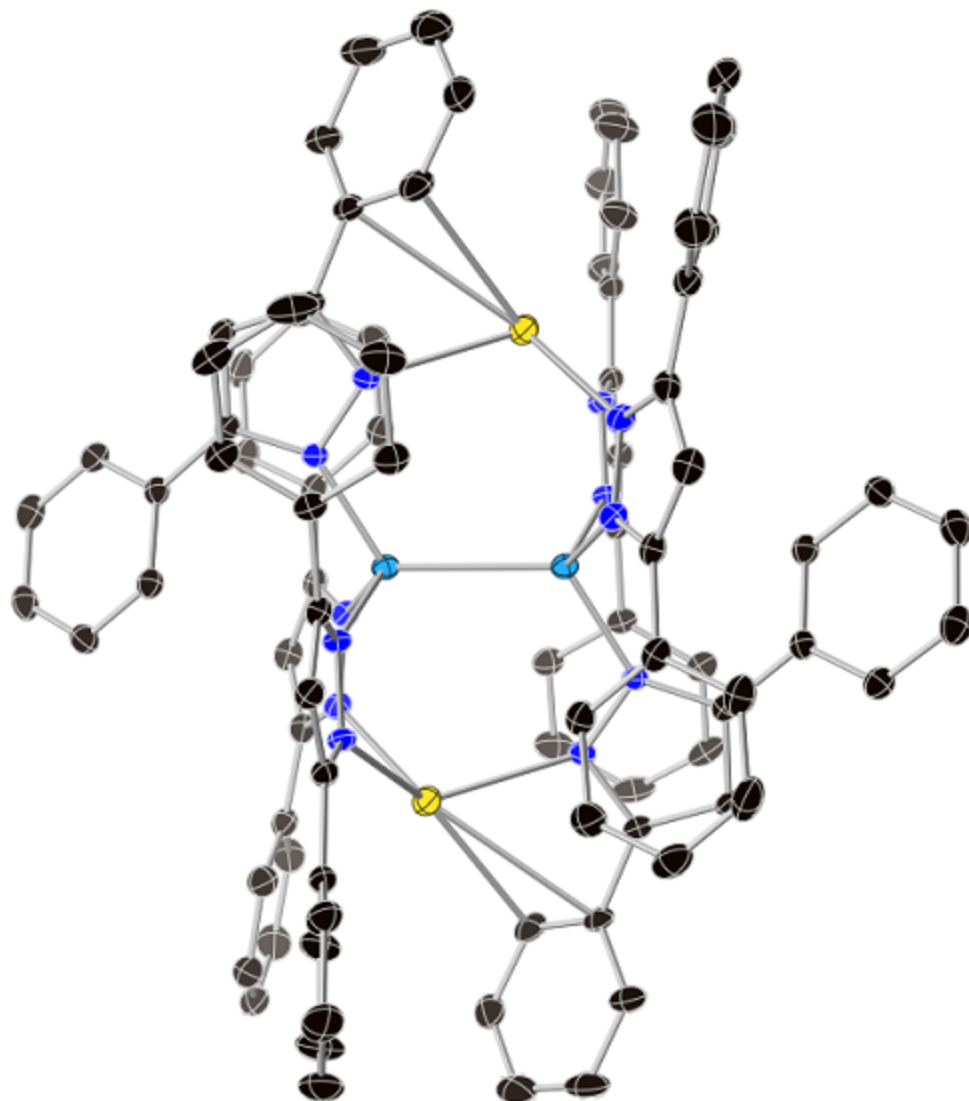

**Supplemental Figure 1.** Perspective views of **1** showing Na:Ph and Ph:pz:Ph interactions

**Table 1.** Crystal data for complex **1**

|                         |                              |
|-------------------------|------------------------------|
| <b>Chemical formula</b> | $C_{97}H_{74}Al_2N_{12}Na_2$ |
| <b>Formula weight</b>   | 1507.62                      |
| <b>Temperature</b>      | 100(2) K                     |
| <b>Wavelength</b>       | 0.71073 Å                    |

|                                            |                                                                              |                                                   |
|--------------------------------------------|------------------------------------------------------------------------------|---------------------------------------------------|
| <b>Crystal size</b>                        | 0.25 × 0.30 × 0.41 mm                                                        |                                                   |
| <b>Crystal system</b>                      | triclinic                                                                    |                                                   |
| <b>Space group</b>                         | P-1                                                                          |                                                   |
| <b>Unit cell dimensions</b>                | a = 10.8421(7) Å                                                             | α = 79.8104(10)°                                  |
|                                            | b = 12.1075(7) Å                                                             | β = 85.2777(10)°                                  |
|                                            | c = 15.5072(10) Å                                                            | γ = 80.2888(9)°                                   |
| <b>Volume</b>                              | 1971.9(2) Å <sup>3</sup>                                                     |                                                   |
| <b>Z</b>                                   | 1                                                                            |                                                   |
| <b>Density (calculated)</b>                | 1.270 Mg/cm <sup>3</sup>                                                     |                                                   |
| <b>Absorption coefficient</b>              | 0.106 mm <sup>-1</sup>                                                       |                                                   |
| <b>F(000)</b>                              | 788                                                                          |                                                   |
| <b>Diffractometer</b>                      | Bruker APEX-II CCD                                                           |                                                   |
| <b>Radiation source</b>                    | sealed tube, MoKα                                                            |                                                   |
| <b>Theta range for data collection</b>     | 1.91 to 30.00°                                                               |                                                   |
| <b>Index ranges</b>                        | -15 ≤ h ≤ 15, -17 ≤ k ≤ 17, -21 ≤ l ≤ 21                                     |                                                   |
| <b>Reflections collected</b>               | 32694                                                                        |                                                   |
| <b>Independent reflections</b>             | 11388 [R(int) = 0.0167]                                                      |                                                   |
| <b>Coverage of independent reflections</b> | 99.10%                                                                       |                                                   |
| <b>Absorption correction</b>               | multi-scan                                                                   |                                                   |
| <b>Max. and min. transmission</b>          | 0.9740 and 0.9060                                                            |                                                   |
| <b>Structure solution technique</b>        | direct methods                                                               |                                                   |
| <b>Structure solution program</b>          | ShelXS-97 (Sheldrick, 2008)                                                  |                                                   |
| <b>Refinement method</b>                   | Full-matrix least-squares on F <sup>2</sup>                                  |                                                   |
| <b>Refinement program</b>                  | ShelXL-2012 (Sheldrick, 2012)                                                |                                                   |
| <b>Function minimized</b>                  | Σ w(F <sub>o</sub> <sup>2</sup> - F <sub>c</sub> <sup>2</sup> ) <sup>2</sup> |                                                   |
| <b>Data / restraints / parameters</b>      | 11388 / 62 / 581                                                             |                                                   |
| <b>Goodness-of-fit on F<sup>2</sup></b>    | 1                                                                            |                                                   |
| <b>Δ/σ<sub>max</sub></b>                   | 0.001                                                                        |                                                   |
| <b>Final R indices</b>                     | 9858 data; I > 2σ(I)                                                         | R <sub>1</sub> = 0.0375, wR <sub>2</sub> = 0.0754 |

|                                    |                                                                       |                                  |
|------------------------------------|-----------------------------------------------------------------------|----------------------------------|
|                                    | all data                                                              | $R_1 = 0.0447$ , $wR_2 = 0.0791$ |
| <b>Weighting scheme</b>            | $w=1/[\sigma^2(F_o^2)+(0.0100P)^2+1.3130P]$<br>, $P=(F_o^2+2F_c^2)/3$ |                                  |
| <b>Largest diff. peak and hole</b> | 0.372 and -0.321 eÅ <sup>-3</sup>                                     |                                  |
| <b>R.M.S. deviation from mean</b>  | 0.044 eÅ <sup>-3</sup>                                                |                                  |

**Table 2.** Bond distances (Å) for complex 1

|         |            |         |            |
|---------|------------|---------|------------|
| A11-N1  | 1.9088(9)  | Na1-C21 | 3.0430(11) |
| A11-N4  | 1.9430(9)  | N1-C1   | 1.3688(13) |
| A11-Na1 | 3.4437(5)  | N2-C2   | 1.3440(13) |
| Na1-N5  | 2.3390(10) | C1-C3   | 1.3893(14) |
| Na1-C22 | 2.7585(12) | C2-C3   | 1.4005(14) |
| Na1-C2  | 3.0760(11) | C2-Na1  | 3.0760(11) |
| N1-N2   | 1.3736(11) | C11-C12 | 1.3998(14) |
| N2-Na1  | 2.3538(10) | C12-C13 | 1.3947(14) |
| C1-C11  | 1.4749(14) | C13-C14 | 1.3872(16) |
| C2-C21  | 1.4748(14) | C14-C15 | 1.3912(17) |
| C11-C16 | 1.4015(14) | C15-C16 | 1.3912(15) |
| C21-C26 | 1.3971(16) | C21-C22 | 1.4004(16) |
| C21-Na1 | 3.0429(11) | C22-C23 | 1.3955(16) |
| C22-Na1 | 2.7585(12) | N4-C4   | 1.3705(13) |
| C23-C24 | 1.386(2)   | N5-C5   | 1.3442(13) |
| C24-C25 | 1.387(2)   | C4-C41  | 1.4855(14) |
| C25-C26 | 1.3908(17) | C5-C51  | 1.4746(14) |
| N4-N5   | 1.3807(11) | C41-C42 | 1.3961(15) |
| C4-C6   | 1.3811(14) | C42-C43 | 1.3932(16) |
| C5-C6   | 1.4049(14) | C43-C44 | 1.3888(19) |
| C41-C46 | 1.3970(15) | C44-C45 | 1.3869(19) |
| C51-C52 | 1.3982(16) | C45-C46 | 1.3921(16) |

|         |            |         |            |
|---------|------------|---------|------------|
| C52-C53 | 1.3922(17) | C51-C56 | 1.3986(16) |
| C53-C54 | 1.384(2)   | N7-N8   | 1.3676(12) |
| C54-C55 | 1.387(2)   | N8-C8   | 1.3438(13) |
| C55-C56 | 1.3937(16) | C7-C71  | 1.4740(15) |
| N7-C7   | 1.3682(13) | C8-C81  | 1.4747(15) |
| C7-C9   | 1.3914(14) | C71-C72 | 1.4007(15) |
| C8-C9   | 1.4010(16) | C72-C73 | 1.3927(16) |
| C71-C76 | 1.4010(15) | C73-C74 | 1.3914(17) |
| C81-C82 | 1.3982(17) | C74-C75 | 1.3882(19) |
| C82-C83 | 1.3922(17) | C75-C76 | 1.3924(18) |
| C83-C84 | 1.392(2)   | C81-C86 | 1.3990(15) |
| C84-C85 | 1.381(2)   | C1A-C2A | 1.508(5)   |
| C85-C86 | 1.3920(18) | C2A-C7A | 1.374(5)   |
| C2A-C3A | 1.399(4)   | C3A-C4A | 1.394(5)   |
| A11-N7  | 1.9192(9)  | C4A-C5A | 1.366(6)   |
| A11-A11 | 2.5794(6)  | C5A-C6A | 1.392(5)   |
| Na1-N8  | 2.3246(10) | C6A-C7A | 1.394(5)   |
| Na1-N2  | 2.3538(10) |         |            |

**Table 3.** Bond angles (°) for complex **1**

|            |           |             |            |
|------------|-----------|-------------|------------|
| N1-A11-N7  | 100.68(4) | N1-A11-A11  | 121.73(3)  |
| N7-A11-N4  | 112.10(4) | N4-A11-A11  | 107.79(3)  |
| N7-A11-A11 | 111.23(3) | N7-A11-Na1  | 68.57(3)   |
| N1-A11-Na1 | 157.73(3) | A11-A11-Na1 | 80.524(15) |
| N4-A11-Na1 | 65.92(3)  | N8-Na1-N2   | 110.71(4)  |
| N8-Na1-N5  | 85.60(3)  | N8-Na1-C22  | 117.17(4)  |
| N5-Na1-N2  | 113.22(3) | N2-Na1-C22  | 70.10(3)   |
| N5-Na1-C22 | 155.02(4) | N5-Na1-C21  | 135.01(3)  |
| N8-Na1-C21 | 138.26(4) | C22-Na1-C21 | 27.37(3)   |
| N2-Na1-C21 | 51.67(3)  | N5-Na1-C2   | 123.48(3)  |
| N8-Na1-C2  | 129.70(3) | C22-Na1-C2  | 50.52(3)   |
| N2-Na1-C2  | 24.32(3)  | N8-Na1-A11  | 52.11(2)   |

|             |            |             |            |
|-------------|------------|-------------|------------|
| C21-Na1-C2  | 27.89(3)   | N2-Na1-A11  | 83.14(2)   |
| N5-Na1-A11  | 56.66(2)   | C21-Na1-A11 | 134.80(2)  |
| C22-Na1-A11 | 145.27(3)  | C1-N1-N2    | 109.34(8)  |
| C2-Na1-A11  | 107.06(2)  | N2-N1-A11   | 113.33(6)  |
| C1-N1-A11   | 136.78(7)  | C2-N2-Na1   | 109.53(7)  |
| C2-N2-N1    | 106.74(8)  | N1-C1-C3    | 108.19(9)  |
| N1-N2-Na1   | 138.15(6)  | C3-C1-C11   | 127.47(9)  |
| N1-C1-C11   | 124.30(9)  | N2-C2-C21   | 119.21(9)  |
| N2-C2-C3    | 110.67(9)  | N2-C2-Na1   | 46.16(5)   |
| C3-C2-C21   | 129.98(9)  | C21-C2-Na1  | 74.81(6)   |
| C3-C2-Na1   | 150.76(7)  | C12-C11-C16 | 118.26(10) |
| C1-C3-C2    | 105.06(9)  | C16-C11-C1  | 118.57(9)  |
| C12-C11-C1  | 123.16(9)  | C14-C13-C12 | 120.35(11) |
| C13-C12-C11 | 120.70(10) | C16-C15-C14 | 120.21(11) |
| C13-C14-C15 | 119.58(10) | C26-C21-C22 | 118.66(10) |
| C15-C16-C11 | 120.88(11) | C22-C21-C2  | 121.31(10) |
| C26-C21-C2  | 119.95(10) | C22-C21-Na1 | 64.93(6)   |
| C26-C21-Na1 | 128.10(8)  | C23-C22-C21 | 120.44(12) |
| C2-C21-Na1  | 77.30(6)   | C21-C22-Na1 | 87.70(6)   |
| C23-C22-Na1 | 116.08(8)  | C24-C23-C22 | 120.12(13) |
| C23-C24-C25 | 119.86(12) | C24-C25-C26 | 120.26(13) |
| C25-C26-C21 | 120.61(12) | C4-N4-N5    | 108.67(8)  |
| C4-N4-A11   | 127.60(7)  | N5-N4-A11   | 121.38(6)  |
| C5-N5-N4    | 106.82(8)  | C5-N5-Na1   | 132.13(7)  |
| N4-N5-Na1   | 115.66(6)  | N4-C4-C6    | 108.96(9)  |
| N4-C4-C41   | 124.19(9)  | C6-C4-C41   | 126.84(9)  |
| N5-C5-C6    | 110.66(9)  | N5-C5-C51   | 120.98(9)  |
| C6-C5-C51   | 128.36(10) | C4-C6-C5    | 104.87(9)  |
| C42-C41-C46 | 119.38(10) | C42-C41-C4  | 120.94(10) |
| C46-C41-C4  | 119.57(9)  | C43-C42-C41 | 120.23(11) |
| C44-C43-C42 | 119.95(11) | C45-C44-C43 | 120.16(11) |
| C44-C45-C46 | 120.10(11) | C45-C46-C41 | 120.15(11) |
| C52-C51-C56 | 118.08(10) | C52-C51-C5  | 121.56(10) |
| C56-C51-C5  | 120.36(10) | C53-C52-C51 | 121.11(12) |

|                 |            |                 |            |
|-----------------|------------|-----------------|------------|
| C54-C53-C52     | 120.13(13) | C53-C54-C55     | 119.55(12) |
| C54-C55-C56     | 120.48(12) | C55-C56-C51     | 120.63(12) |
| N8-N7-C7        | 109.32(8)  | N8-N7-A11       | 110.95(6)  |
| C7-N7-A11       | 139.38(7)  | C8-N8-N7        | 107.17(9)  |
| C8-N8-Na1       | 125.60(7)  | N7-N8-Na1       | 122.75(6)  |
| N7-C7-C9        | 108.09(9)  | N7-C7-C71       | 122.23(9)  |
| C9-C7-C71       | 129.67(10) | N8-C8-C9        | 110.31(9)  |
| N8-C8-C81       | 118.04(10) | C9-C8-C81       | 131.64(10) |
| C7-C9-C8        | 105.11(9)  | C72-C71-C76     | 118.54(10) |
| C72-C71-C7      | 121.41(10) | C76-C71-C7      | 120.02(10) |
| C73-C72-C71     | 120.81(11) | C74-C73-C72     | 119.96(12) |
| C75-C74-C73     | 119.69(12) | C74-C75-C76     | 120.50(11) |
| C75-C76-C71     | 120.35(11) | C82-C81-C86     | 118.94(11) |
| C82-C81-C8      | 119.42(10) | C86-C81-C8      | 121.64(11) |
| C83-C82-C81     | 120.72(12) | C84-C83-C82     | 119.60(13) |
| C85-C84-C83     | 120.14(12) | C84-C85-C86     | 120.52(12) |
| C85-C86-C81     | 120.05(13) | C7A-C2A-<br>C3A | 118.1(3)   |
| C4A-C5A-<br>C6A | 119.3(4)   | C3A-C2A-<br>C1A | 121.5(3)   |
| C2A-C7A-<br>C6A | 121.7(4)   | C5A-C4A-<br>C3A | 121.0(3)   |
| N1-A11-N4       | 103.00(4)  | C5A-C6A-<br>C7A | 119.6(4)   |
